# Supplementary material for: Domain boundary structures in lanthanum lithium titanates
Source: Royal Society of Chemistry journal article supplement (doi:10.1039/c3ta13726k), 2013-11-04
Supplement: c3ta13726k.pdf [file c3ta13726k.pdf]

## Electronic Supporting Information (ESI) for

### Domain Boundary Structures in Lanthanum Lithium Titanates

Xiang Gao, Craig A. J. Fisher, Teiichi Kimura, Yumi H. Ikuhara, Akihide Kuwabara, Hiroki Moriwake, Hideki Oki, Takeshi Tojigamori, Keiichi Kohama, and Yuichi Ikuhara\*

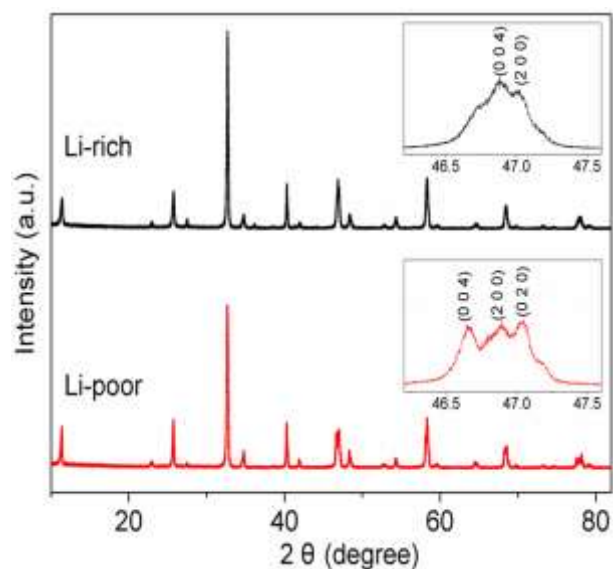

**Figure S1.** XRD patterns for the Li-poor ( $\text{La}_{0.62}\text{Li}_{0.16}\text{TiO}_3$ ) and Li-rich ( $\text{La}_{0.56}\text{Li}_{0.33}\text{TiO}_3$ ) samples, with splitting of the (200) peaks shown in the insets.

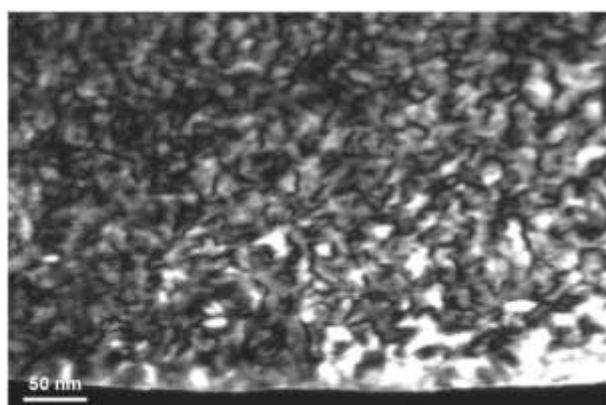

**Figure S2.** A two-beam image of the small microdomains of various orientations in the Li-rich sample showing that distinct DBs cannot be visualized as clearly at low magnification as in the Li-poor sample.

**Table S1.** Lattice mismatch ( $f$ ) calculated from the lattice parameters determined by XRD at 90° DBs in both Li-poor and Li-rich LLTO compounds.

| Interface relation  | $f$ (%) (lattice relation)   |                               |
|---------------------|------------------------------|-------------------------------|
|                     | Li-poor                      | Li-rich                       |
| $(010)_P / (001)_P$ | <b>0</b> ( $a_I/a_{II}$ )    | <b>0</b> ( $2a_I/2a_{II}$ )   |
|                     | <b>0.36</b> ( $b_I/c_{II}$ ) | <b>0.04</b> ( $2b_I/c_{II}$ ) |
| $(100)_P / (001)_P$ | <b>0.22</b> ( $a_I/b_{II}$ ) | <b>0</b> ( $2a_I/2b_{II}$ )   |
|                     | <b>0.59</b> ( $a_I/c_{II}$ ) | <b>0.04</b> ( $2a_I/c_{II}$ ) |

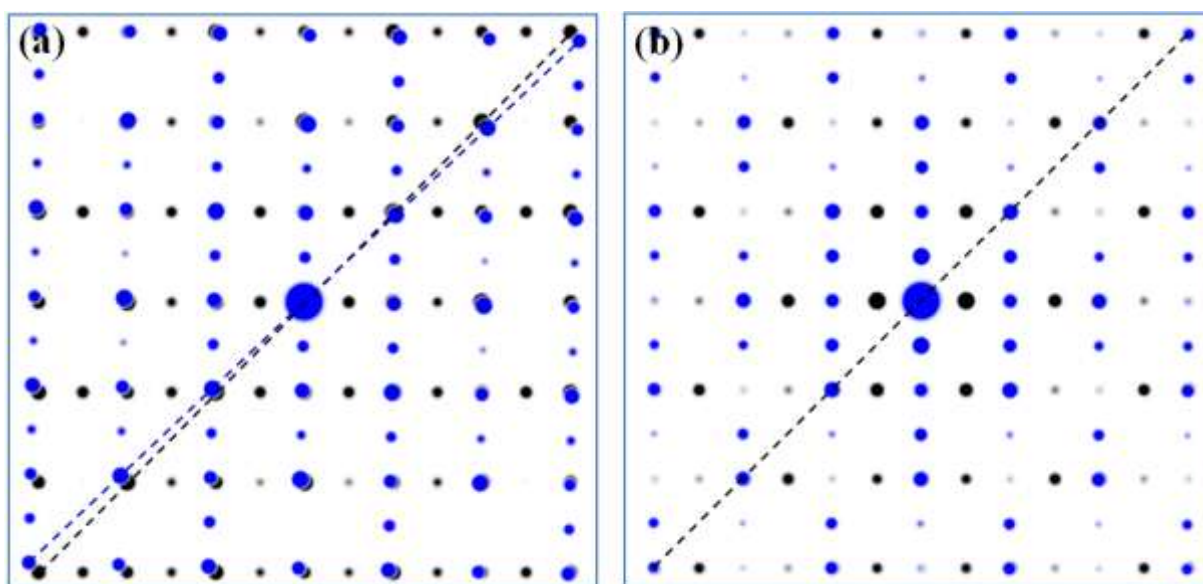

**Figure S3.** Simulated SAED patterns for two crystal domains inclined at 1.1° and 0.2° with respect to each other to form a nominally 90° DB in (a) Li-poor and (b) Li-rich LLTO compounds. Reflection splitting is highlighted by the mismatch between dashed lines in (a).
